# Supplementary material for: Searching for a signature involving 10 genes to predict the survival of patients with acute myelocytic leukemia through a combined multi-omics analysis
Source: PubMed Central journal article supplement (PMC7321666; doi:10.7717/peerj.9437), 2020-06-25

**A**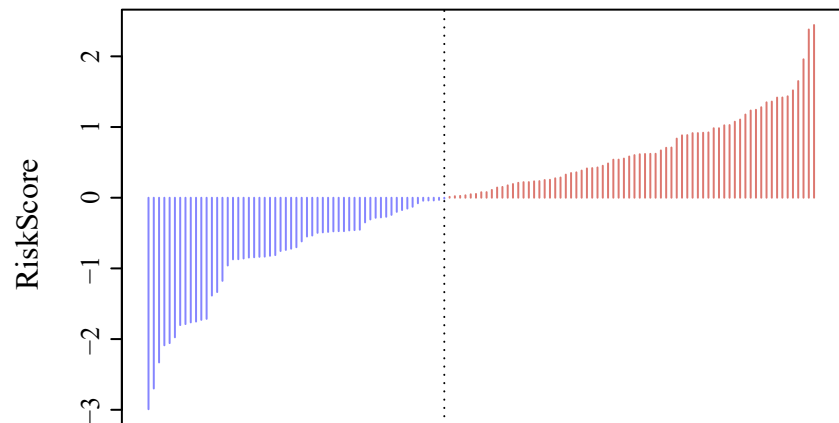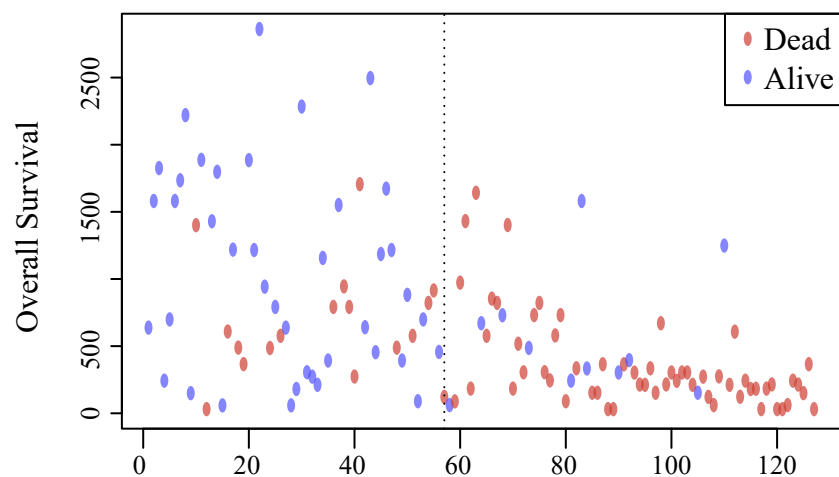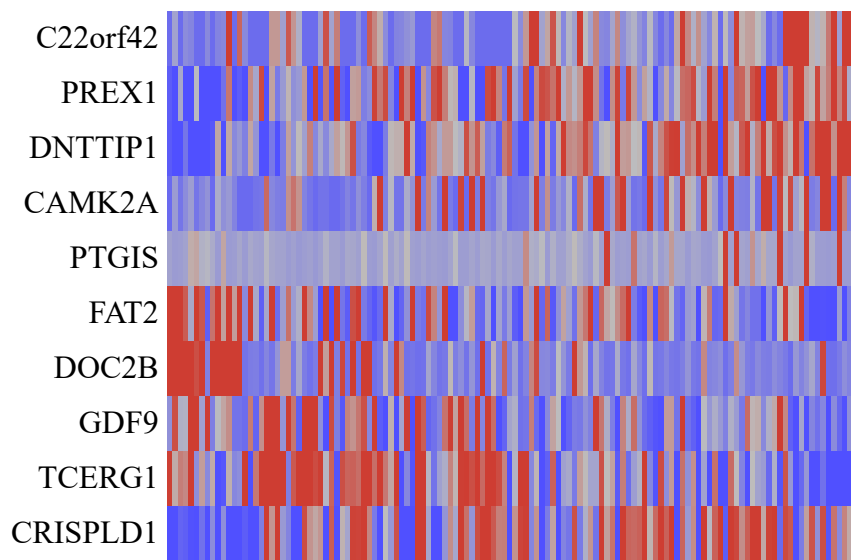**B**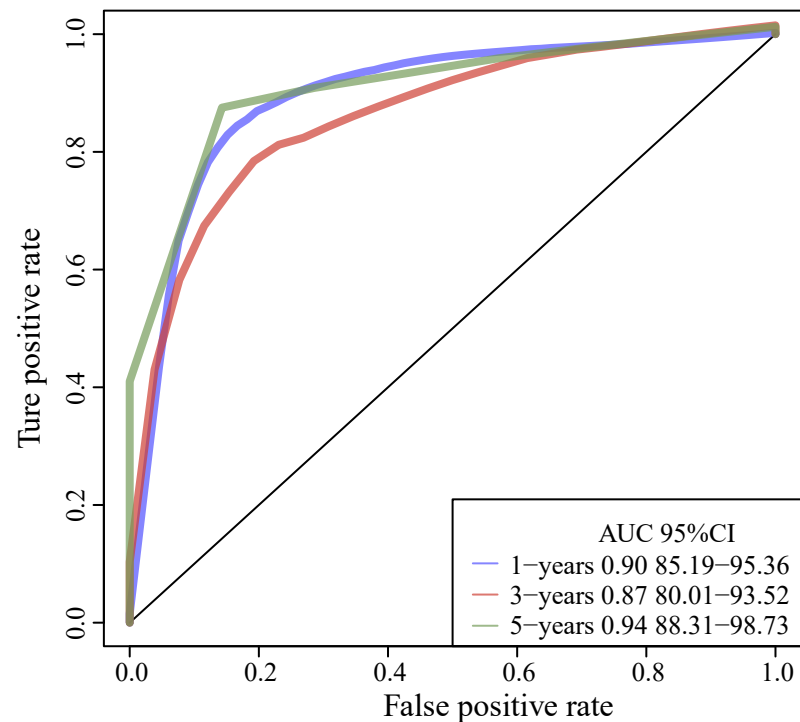**C**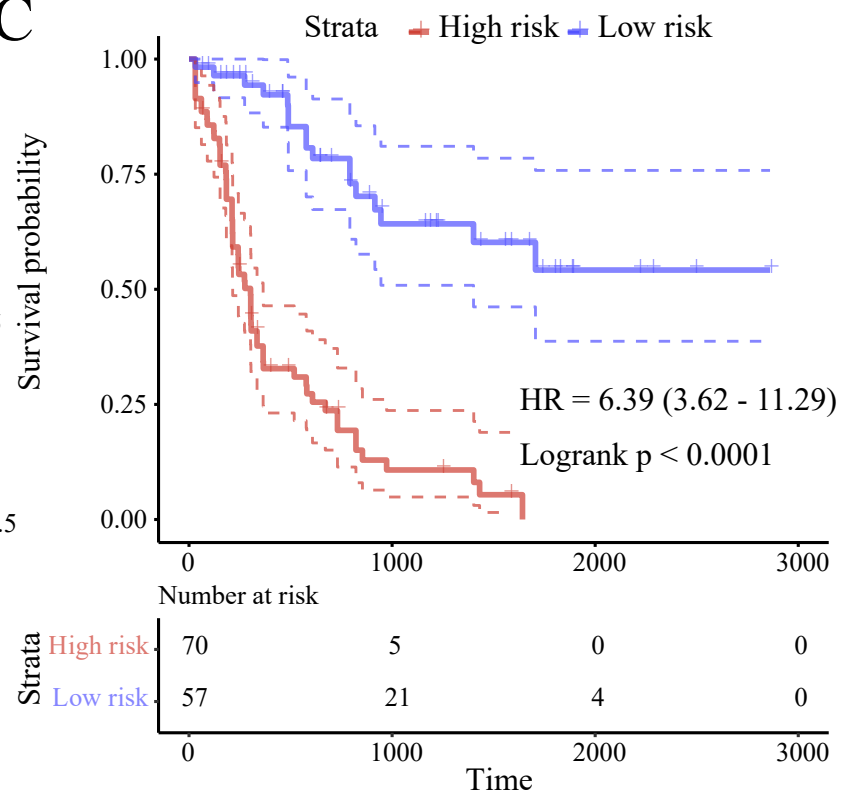

Supplement: peerj-08-9437-s003.pdf [file peerj-08-9437-s003.pdf]
