# Supplementary material for: Searching for a signature involving 10 genes to predict the survival of patients with acute myelocytic leukemia through a combined multi-omics analysis
Source: PeerJ. 2020 Jun 25;8:e9437. doi: 10.7717/peerj.9437 (PMC7321666; doi:10.7717/peerj.9437)
Supplement: Table S2 [file peerj-08-9437-s008.xls]

## Sheet: Supplement Table 2
cytoband	4q34.3	7q34	5q23.1	16q23.1	12p13.2	5q21.3	17q11.2	17p13.3	4p15.2	3p13	17p13.2	20q13.13	18p11.21
q value	8.5409e-12	1.4141e-11	8.5409e-12	1.2451e-05	7.2811e-05	1.6661e-11	0.00065759	3.2989e-06	0.0043287	0.011374	1.4247e-05	0.029771	0.043624
residual q value	8.5409e-12	1.4141e-11	4.606e-08	1.2451e-05	7.2811e-05	0.00035756	0.00065759	0.0013432	0.0043287	0.011374	0.015127	0.029771	0.043624
wide peak boundaries	chr4:179872885-179976378	chr7:142379140-142810363	chr5:111587243-155310074	chr16:75975918-76025326	chr12:11314522-13304505	chr5:93451794-155509849	chr17:31116250-31363074	chr17:1-1191066	chr4:21554884-21580908	chr3:70344999-73100579	chr17:3344133-3470263	chr20:34737654-50947602	chr18:12284515-12846351
genes in wide peak	[LINC00290]	PRSS1	hsa-mir-886	[CNTNAP4]	CDKN1B	hsa-mir-886	EVI2A	ABR	KCNIP4	GPR27	OR1E1	hsa-mir-1259	PTPN2
		PRSS2	hsa-mir-1244-2		CREBL2	hsa-mir-1244-2	EVI2B	DOC2B		RYBP	OR1E2	ADA	PRELID3A
		MTRNR2L6	ADRB2		EMP1	ADRB2	NF1	RPH3AL		FOXP1	OR3A3	BPI	AFG3L2
			ANXA6		ETV6	ANXA6	OMG	TIMM22		EBLN2	SPATA22	CD40	SPIRE1
			APC		GPR19	APC		GEMIN4		SHQ1		CEBPB	PSMG2
			ATOX1		LRP6	ATOX1		GLOD4		PROK2		CSE1L	CEP76
			ALDH7A1		PRB1	ALDH7A1		MRM3		PPP4R2		EPB41L1	TUBB6
			CAMK2A		GPRC5A	CAMK4		VPS53		LINC00870		EYA2	LOC100996324
			CAMLG		HEBP1	CAMK2A		NXN		LINC00877		GGT7	LOC105371998
			CD14		DDX47	CAMLG		FAM57A		EIF4E3		GHRH
			CD74		MANSC1	CAST		RFLNB		GXYLT2		GSS
			CDC25C		GPRC5D	CD14		C17orf97		MIR1284		HNF4A
			CDO1		FAM234B	CD74		SCGB1C2		FOXP1-AS1		EIF6
			CDX1		BCL2L14	CDC25C		DBIL5P		LOC105377162		KCNB1
			AP3S1		DUSP16	CDO1		MIR3183				KCNS1
			CSF1R		APOLD1	CDX1		LOC100506371				LBP
			CSF2		GSG1	CHD1		LOC100506388				MMP9
			CSNK1A1		HTR7P1	AP3S1		LOC101927727				MYBL2
			CSNK1G3		BORCS5	CSF1R		LOC105371430				NNAT
			CTNNA1		LINC01252	CSF2						PI3
			DMXL1		RPL13AP20	CSNK1A1						PLCG1
			DIAPH1		LOH12CR2	CSNK1G3						PLTP
			DPYSL3		PRB2	CTNNA1						CTSA
			SLC26A2		MIR613	DMXL1						PTGIS
			HBEGF		MIR614	DIAPH1						PTPN1
			EGR1		MIR1244-1	DPYSL3						RBL1
			ETF1		MIR1244-3	SLC26A2						RPN2
			FAT2		MIR1244-2	HBEGF						SDC4
			FBN2		LOC100506314	EFNA5						SEMG1
			FGF1		MIR7641-2	EGR1						SEMG2
			GDF9			ETF1						SRSF6
			GFRA3			FAT2						SLPI
			GLRA1			FBN2						SNAI1
			GM2A			FER						SPAG4
			GPX3			FGF1						SRC
			GRIA1			GDF9						STAU1
			NR3C1			GFRA3						STK4
			HARS			GLRA1						TGM2
			HINT1			GLRX						TNNC2
			HSD17B4			GM2A						TOP1
			HSPA4			GPX3						UBE2V1
			HSPA9			GRIA1						YWHAB
			NDST1			NR3C1						MKRN7P
			HTR4			HARS						GDF5
			IK			HINT1						NCOA3
			IL3			HSD17B4						MATN4
			IL4			HSPA4						DPM1
			IL5			HSPA9						WISP2
			IL9			NDST1						CPNE1
			IL13			HTR4						NFS1
			IRF1			IK						B4GALT5
			KCNN2			IL3						RBM39
			LECT2			IL4						TTI1
			LMNB1			IL5						SPATA2
			LOX			IL9						MAFB
			SMAD5			IL13						ACOT8
			MCC			IRF1						SGK2
			MFAP3			KCNN2						RBM12
			NDUFA2			LECT2						MYL9
			NEUROG1			LMNB1						WFDC2
			NPY6R			LNPEP						PROCR
			PCDH1			LOX						ARFGEF2
			PCDHGC3			SMAD5						SPINT3
			PDE6A			MAN2A1						MMP24
			PDGFRB			MCC						BLCAP
			PFDN1			MFAP3						TOMM34
			PGGT1B			NDUFA2						SERINC3
			PITX1			NEUROG1						UBE2C
			POU4F3			NPY6R						PTPRT
			PPIC			PAM						PKIG
			PPP2CA			PCDH1						CEP250
			PPP2R2B			PCDHGC3						RBPJL
			PURA			PCSK1						DLGAP4
			RPS14			PDE6A						ZHX3
			SKP1			PDGFRB						NCOA6
			SLC6A7			PFDN1						SLC9A8
			SLC12A2			PGGT1B						ADNP
			SLC22A4			PITX1						ZMYND8
			SLC22A5			POU4F3						SAMHD1
			SNX2			PPIC						AAR2
			SPARC			PPP2CA						L3MBTL1
			SPINK1			PPP2R2B						PPP1R16B
			SPOCK1			PURA						TRPC4AP
			SRP19			RPS14						SNORD12C
			TAF7			SKP1						SNORA71B
			TCF7			SLC6A7						SNORA71A
			TCOF1			SLC12A2						TP53TG5
			TGFBI			SLC22A4						SLC35C2
			UBE2B			SLC22A5						IFT52
			UBE2D2			SNX2						PHF20
			VDAC1			SPARC						SCAND1
			WNT8A			SPINK1						OSER1
			REEP5			SPOCK1						PIGT
			NME5			SRP19						ERGIC3
			PDLIM4			TAF7						UQCC1
			EIF4EBP3			TCF7						BCAS4
			PCDHGB4			TCOF1						DDX27
			CDC23			NR2F1						ZNF334
			HDAC3			TGFBI						EDEM2
			P4HA2			UBE2B						DBNDD2
			ATG12			UBE2D2						ACSS2
			NREP			VDAC1						RNF114
			CNOT8			WNT8A						SULF2
			HAND1			ST8SIA4						C20orf24
			MYOT			REEP5						CTNNBL1
			NRG2			NME5						EPPIN
			CXCL14			PDLIM4						RALGAPB
			H2AFY			EIF4EBP3						JPH2
			SMAD5-AS1			PCDHGB4						ZNFX1
			RNF14			CDC23						NDRG3
			SNCAIP			HDAC3						SLC12A5
			PCDHGA8			P4HA2						PREX1
			PCDHA9			ATG12						MYH7B
			MATR3			NREP						NCOA5
			KIAA0141			CNOT8						RPRD1B
			JAKMIP2			RAB9BP1						TGIF2
			DDX46			HAND1						KCNK15
			SLC23A1			MYOT						DHX35
			GNPDA1			NRG2						MANBAL
			SRA1			CXCL14						ELMO2
			RAD50			H2AFY						ZNF335
			KIF20A			SMAD5-AS1						PCIF1
			G3BP1			RNF14						CDH22
			APBB3			SNCAIP						SLC13A3
			TNIP1			TTC37						LPIN3
			SEC24A			PCDHGA8						GDAP1L1
			FAXDC2			PCDHA9						LINC01260
			FAM114A2			MATR3						TTPAL
			BRD8			KIAA0141						ACTR5
			TCERG1			JAKMIP2						DSN1
			HNRNPA0			PJA2						FER1L4
			SPINK5			DDX46						PABPC1L
			KIF3A			SLC23A1						SLC2A10
			SYNPO			GNPDA1						FAM83D
			ABLIM3			SRA1						SLA2
			HMGXB3			RAD50						CHD6
			ARHGAP26			KIF20A						PARD6B
			FSTL4			G3BP1						TOX2
			2019-09-08			APBB3						KIAA1755
			ACSL6			TNIP1						EMILIN3
			JADE2			SEC24A						SYS1
			LARP1			FAXDC2						WFDC8
			HARS2			FAM114A2						SNX21
			TNFAIP8			BRD8						ZSWIM1
			GEMIN5			TCERG1						TP53RK
			PCDHGA12			HNRNPA0						DNTTIP1
			LRRTM2			SPINK5						VSTM2L
			CCDC69			KIF3A						SNHG11
			PCDHB5			SYNPO						FITM2
			FBXL21			RHOBTB3						WFDC12
			KLHL3			ABLIM3						SPATA25
			SNORD63			ELL2						OCSTAMP
			SNORA74A			HMGXB3						HMGB3P1
			PKD2L2			ARHGAP26						FAM83C
			UQCRQ			FSTL4						SLC32A1
			AFF4			2019-09-08						WFDC3
			IL17B			PPIP5K2						MROH8
			SLC27A6			ACSL6						SOGA1
			SNX24			JADE2						TLDC2
			MRPL22			LARP1						RIMS4
			PCDHB1			HARS2						ROMO1
			TMED7			TNFAIP8						NEURL2
			ISOC1			GEMIN5						ZSWIM3
			SAR1B			PCDHGA12						WFDC10A
			DCTN4			LRRTM2						LINC01620
			MZB1			CCDC69						FAM83C-AS1
			PAIP2			PCDHB5						WFDC6
			CDKL3			FBXL21						C20orf173
			PCDH12			KLHL3						FAM65C
			FAM13B			SNORD63						CNBD2
			FAM53C			SNORA74A						R3HDML
			REEP2			PKD2L2						LOC149684
			PRR16			UQCRQ						ADIG
			COMMD10			AFF4						GTSF1L
			LARS			IL17B						WFDC5
			CXXC5			SLC27A6						WFDC13
			RAPGEF6			SNX24						WFDC11
			KDM3B			MRPL22						WFDC9
			PHAX			PCDHB1						WFDC10B
			RBM27			TMED7						LINC00494
			EPB41L4A-AS2			ISOC1						LINC01270
			PCDHB18P			SAR1B						LOC339568
			PCDHB17P			DCTN4						ARHGAP40
			ZCCHC10			MZB1						TMEM189
			WDR55			PAIP2						TMEM189-UBE2V1
			ANKHD1			CDKL3						SNHG17
			TMCO6			PCDH12						SPINT4
			TRIM36			FAM13B						ZFAS1
			GALNT10			FAM53C						MIR499A
			RBM22			REEP2						NORAD
			PCDHGC5			PRR16						SNORA71E
			PCDHGC4			COMMD10						SNORA60
			PCDHGB7			LARS						SNORA71C
			PCDHGB6			CXXC5						SNORA71D
			PCDHGB5			RAPGEF6						SNORD12
			PCDHGB3			ERAP1						MIR645
			PCDHGB2			KDM3B						SYS1-DBNDD2
			PCDHGB1			PHAX						SNORD12B
			PCDHGA11			RBM27						LOC100128988
			PCDHGA10			EPB41L4A-AS2						ZNF663P
			PCDHGA9			PCDHB18P						LOC100131496
			PCDHGA7			PCDHB17P						LOC100287792
			PCDHGA6			ZCCHC10						MIR1289-1
			PCDHGA5			GIN1						MIR1302-5
			PCDHGA4			WDR55						MIR3646
			PCDHGA3			ANKHD1						MIR3616
			PCDHGA2			TMCO6						MIR3617
			PCDHGA1			TRIM36						LINC01370
			PCDHGB8P			GALNT10						OSER1-AS1
			PCDHB15			RBM22						STK4-AS1
			PCDHB14			RIOK2						LINC01272
			PCDHB13			PCDHGC5						LOC100506175
			PCDHB12			PCDHGC4						EPPIN-WFDC6
			PCDHB11			PCDHGB7						TGIF2-C20orf24
			PCDHB10			PCDHGB6						MIR499B
			PCDHB9			PCDHGB5						MIR548O2
			PCDHB8			PCDHGB3						LINC00489
			PCDHB7			PCDHGB2						TRERNA1
			PCDHB6			PCDHGB1						LINC01523
			PCDHB4			PCDHGA11						MMP24-AS1
			PCDHB3			PCDHGA10						DLGAP4-AS1
			PCDHB2			PCDHGA9						PLCG1-AS1
			PCDHAC2			PCDHGA7						LOC101927159
			PCDHAC1			PCDHGA6						HNF4A-AS1
			PCDHA13			PCDHGA5						LINC01430
			PCDHA12			PCDHGA4						LOC101927377
			PCDHA11			PCDHGA3						LINC01522
			PCDHA10			PCDHGA2						LINC01273
			PCDHA8			PCDHGA1						CEBPB-AS1
			PCDHA7			PCDHGB8P						LINC01271
			PCDHA6			PCDHB15						ADNP-AS1
			PCDHA5			PCDHB14						MIR6812
			PCDHA4			PCDHB13						MIR6871
			PCDHA3			PCDHB12						CSE1L-AS1
			PCDHA2			PCDHB11						LOC105372626
			PCDHA1			PCDHB10						LOC105372653
			VTRNA1-3			PCDHB9						KCNK15-AS1
			VTRNA1-2			PCDHB8
			VTRNA1-1			PCDHB7
			NMUR2			PCDHB6
			FEM1C			PCDHB4
			C5orf15			PCDHB3
			CDC42SE2			PCDHB2
			TRPC7			PCDHAC2
			ZNF608			PCDHAC1
			KCTD16			PCDHA13
			SEMA6A			PCDHA12
			PCDHB16			PCDHA11
			HMHB1			PCDHA10
			EPB41L4A			PCDHA8
			SIL1			PCDHA7
			ARAP3			PCDHA6
			YTHDC2			PCDHA5
			GRAMD3			PCDHA4
			PCYOX1L			PCDHA3
			SH3TC2			PCDHA2
			SAP30L			PCDHA1
			TXNDC15			VTRNA1-3
			NDFIP1			VTRNA1-2
			FBXO38			VTRNA1-1
			YIPF5			NMUR2
			TIGD6			FEM1C
			SPRY4			C5orf15
			SLC4A9			CDC42SE2
			SLC25A2			TRPC7
			TSSK1B			ZNF608
			PCDHB19P			KCTD16
			PCBD2			SEMA6A
			PSD2			PCDHB16
			CYSTM1			HMHB1
			MEGF10			EPB41L4A
			SPINK7			ERAP2
			SMIM3			SIL1
			FCHSD1			ARAP3
			LYRM7			FBXL17
			CDKN2AIPNL			YTHDC2
			ZNF300			GRAMD3
			MYOZ3			PCYOX1L
			PRDM6			SH3TC2
			FTMT			SAP30L
			FNIP1			TXNDC15
			SLC35A4			MCTP1
			EPB41L4A-AS1			NDFIP1
			2019-03-03			FBXO38
			LEAP2			YIPF5
			SCGB3A2			TIGD6
			PPARGC1B			SPRY4
			PRRC1			NUDT12
			ZNF474			SLC4A9
			AFAP1L1			SLC25A2
			GRPEL2			SPATA9
			GPR151			TSSK1B
			ZNF300P1			FAM172A
			SOWAHA			PCDHB19P
			SHROOM1			PCBD2
			C5orf24			PSD2
			DCANP1			SLF1
			MGC32805			CYSTM1
			SLC36A2			MEGF10
			SPINK13			SPINK7
			CEP120			SMIM3
			SLC25A48			TSLP
			SRFBP1			FCHSD1
			JAKMIP2-AS1			C5orf30
			ZMAT2			LYRM7
			CCDC112			SLC25A46
			PRELID2			CDKN2AIPNL
			SH3RF2			ZNF300
			PLAC8L1			MYOZ3
			DCP2			PRDM6
			ADAMTS19			FTMT
			SPATA24			FNIP1
			DNAJC18			SLC35A4
			STK32A			EPB41L4A-AS1
			LVRN			2019-03-03
			SLC36A1			LEAP2
			LOC255187			SCGB3A2
			DTWD2			SLCO6A1
			RELL2			PPARGC1B
			SLC36A3			PRRC1
			KIF4B			ZNF474
			CHSY3			POU5F2
			TMEM173			AFAP1L1
			FAM170A			GRPEL2
			C5orf66-AS2			GPR151
			LOC340074			STARD4
			ARSI			WDR36
			IRGM			ZNF300P1
			CATSPER3			SOWAHA
			TICAM2			SHROOM1
			DND1			C5orf24
			SAP30L-AS1			DCANP1
			TEX43			MGC32805
			LOC389332			SLC36A2
			PROB1			SPINK13
			C5orf46			CEP120
			ARHGEF37			SLC25A48
			C5orf63			SRFBP1
			SPINK6			JAKMIP2-AS1
			ANKHD1-EIF4EBP3			ZMAT2
			MIR143			ARSK
			MIR145			FAM81B
			SPINK14			CCDC112
			C5orf56			PRELID2
			IGIP			SH3RF2
			MIR378A			PLAC8L1
			TIFAB			DCP2
			LOC553103			LIX1
			CTXN3			ADAMTS19
			ECSCR			SPATA24
			GRXCR2			DNAJC18
			SPINK9			LINC01554
			ARL14EPL			STK32A
			LOC644762			LVRN
			LINC01184			SLC36A1
			CCNI2			LOC255187
			SNORA13			KIAA0825
			MIR584			GPR150
			SNHG4			DTWD2
			CARMN			RELL2
			LINC00992			SLC36A3
			CCDC192			KIF4B
			MEIKIN			RGMB
			LOC729080			LINC00491
			VTRNA2-1			RFESD
			MIR874			CHSY3
			KIAA1024L			TMEM173
			LOC100130172			FAM170A
			MIR1289-2			C5orf66-AS2
			MIR1294			LOC340074
			MIR1303			ARSI
			MIR1244-1			IRGM
			TMED7-TICAM2			FAM174A
			MIR1244-3			CATSPER3
			MIR1244-2			SLCO4C1
			MIR3141			TICAM2
			MIR3655			DND1
			MIR3936			SAP30L-AS1
			MIR3661			TEX43
			LINC01024			LOC389332
			LOC100505658			PROB1
			STARD4-AS1			C5orf46
			HNCAT21			ARHGEF37
			LOC100505841			C5orf63
			MIR4633			SPINK6
			MIR4461			ANKHD1-EIF4EBP3
			MIR4454			MIR143
			MIR378H			MIR145
			MIR4460			SPINK14
			SPRY4-IT1			NR2F1-AS1
			LOC100652758			C5orf56
			MIR5197			IGIP
			MIR5692C1			MIR378A
			MIR5706			TIFAB
			P4HA2-AS1			RGMB-AS1
			NREP-AS1			LOC553103
			ARHGAP26-AS1			CTXN3
			PPP2R2B-IT1			ECSCR
			ARHGAP26-IT1			TMEM232
			C5orf66			GRXCR2
			LOC101926905			SPINK9
			LOC101926941			ARL14EPL
			LOC101926975			LOC644762
			LOC101927023			LINC01184
			LOC101927059			CCNI2
			LOC101927078			SNORA13
			CTB-113P19.1			MIR583
			LOC101927100			MIR584
			CTB-12O2.1			SNHG4
			LINC01470			CARMN
			LOC101927190			LINC00992
			SEMA6A-AS1			CCDC192
			HRAT56			MEIKIN
			LOC101927357			LOC729080
			LOC101927379			VTRNA2-1
			LOC101927421			MIR874
			LOC101927460			KIAA1024L
			LOC101927488			LOC100130172
			TH2LCRR			LOC100133050
			LOC101927934			LOC100289230
			C5orf66-AS1			LOC100289673
			LOC101929696			MIR1289-2
			LOC101929719			MIR548F3
			MIR6499			MIR1294
			MIR6830			MIR1303
			MIR6831			MIR1244-1
			LOC102467214			MIR548P
			LOC102467216			TMED7-TICAM2
			LOC102467217			MIR2277
			LOC102467223			MIR1244-3
			LOC102467224			MIR1244-2
			LOC102467225			MIR3141
			LOC102467226			MIR3655
			LOC102546228			MIR3936
			LOC102546229			MIR3661
			LOC102546294			LINC01024
			LOC102546298			LOC100505658
			LOC102723557			STARD4-AS1
			ADAMTS19-AS1			HNCAT21
			LINC01170			LOC100505841
			LOC105379143			MIR4633
			LOC105379176			MIR4461
			LOC105379183			MIR4454
			LOC105379192			MIR378H
			LOC105379194			MIR4460
			WSPAR			SPRY4-IT1
			GRPEL2-AS1			LOC100652758
			TRPC7-AS2			LINC01023
						MIR5197
						MIR5692C1
						MIR5706
						LINC00492
						P4HA2-AS1
						NREP-AS1
						ARHGAP26-AS1
						PPP2R2B-IT1
						ARHGAP26-IT1
						C5orf66
						LOC101926905
						LOC101926941
						LOC101926975
						LOC101927023
						LOC101927059
						LOC101927078
						CTB-113P19.1
						LOC101927100
						CTB-12O2.1
						LINC01470
						LOC101927190
						SEMA6A-AS1
						HRAT56
						LOC101927357
						LOC101927379
						LOC101927421
						LOC101927460
						LOC101927488
						TH2LCRR
						LOC101927934
						C5orf66-AS1
						LOC101929696
						LOC101929710
						LOC101929719
						MIR6499
						MIR6830
						MIR6831
						LOC102467212
						LOC102467213
						LOC102467214
						LOC102467216
						LOC102467217
						LOC102467223
						LOC102467224
						LOC102467225
						LOC102467226
						LINC01340
						LOC102546228
						LOC102546229
						LOC102546294
						LOC102546298
						LOC102723557
						CTD-2151A2.1
						ADAMTS19-AS1
						LINC01170
						LOC105379143
						LOC105379176
						LOC105379183
						LOC105379192
						LOC105379194
						WSPAR
						GRPEL2-AS1
						TRPC7-AS2
